# Supplementary material for: Wheat straw carbon matrix wrapped sulfur composites as a superior cathode for Li–S batteries
Source: Royal Society of Chemistry journal article supplement (doi:10.1039/c5ra21416e), 2015-01-01

## Supporting Information

### **Wheat Straw Carbon Matrix Wrapped Sulfur Composites as Superior Cathode for Li-S Batteries**

Youmin Cheng<sup>a</sup>, Shaomin Ji<sup>a\*</sup>, Xijun Xu<sup>a</sup>, Jun Liu<sup>a,b\*</sup>

<sup>a</sup>Key Laboratory of Low Dimensional Materials & Application Technology, Ministry of Education, School of Materials science and engineering, Xiangtan University, Xiangtan 411105, China

Email: smji@xtu.edu.cn

<sup>b</sup>Key Laboratory of Advanced Energy Storage Materials of Guangdong Province School of Materials Science and Engineering, South China University of Technology, Guangzhou 510641, China

Email: msjliu@scut.edu.cn; jliu@xtu.edu.cn

**Table S1.** Physical characterization of WSC and WSC/S-74 wt% composite

| Samples      | $S_{\text{BET}}$<br>( $\text{m}^2\text{g}^{-1}$ ) | Total pore<br>volume ( $\text{cm}^3\text{g}^{-1}$ ) | Average pore<br>size (nm) |
|--------------|---------------------------------------------------|-----------------------------------------------------|---------------------------|
| WSC          | 1066                                              | 0.62                                                | 2.33                      |
| WSC/S-74 wt% | 43                                                | 0.05                                                | 5.06                      |

**Figure  
S1.**

Preparation processes of the WSC/S composite

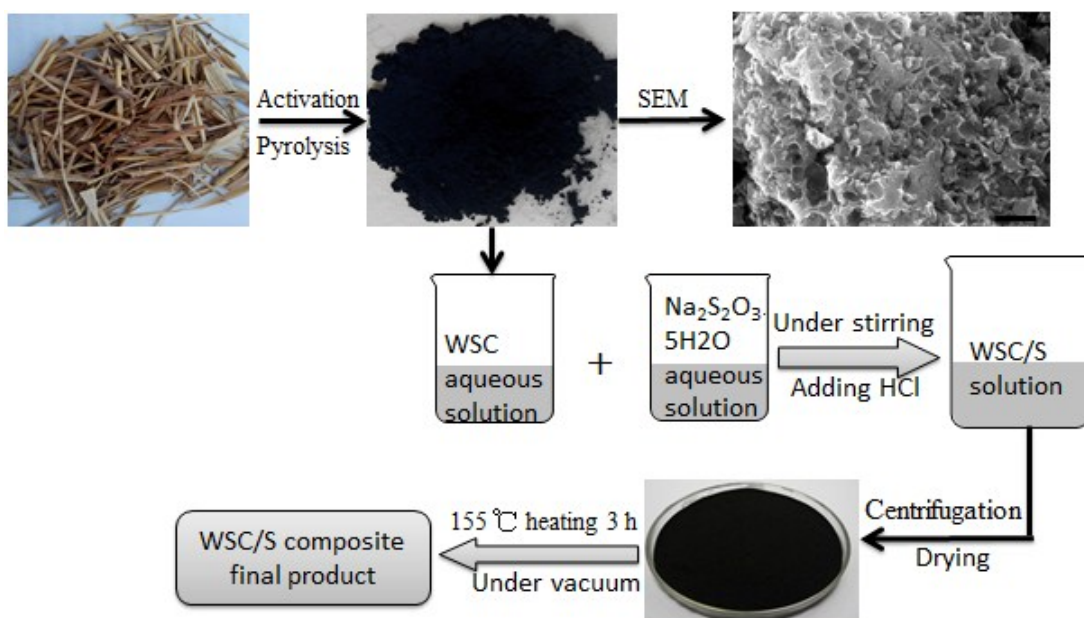

Supplement: c5ra21416e1.pdf [file c5ra21416e1.pdf]
